# Supplementary material for: Development of a Chicken Gastrointestinal Tract (GIT) Simulation Model: Impact of Cecal Inoculum Storage Preservation Conditions
Source: MDPI journal article supplement (doi:10.3390/applmicrobiol3030066), 2023-08-22
Supplement: s1 [file s1]

## Supplementary materials:

**Table S1.** Information regarding the selected broilers for the preparation of the cecal inoculum used in this study.

| Broiler     | Cecal inoculum        |                    |                                    |
|-------------|-----------------------|--------------------|------------------------------------|
|             | Live Body weight (kg) | Cecal content (g)  | Representation in the inoculum (%) |
| 1           | 2.04                  | 3.25               | 3.80                               |
| 2           | 1.84                  | 3.45               | 4.03                               |
| 3           | 1.70                  | 3.67               | 4.29                               |
| 4           | 1.68                  | 3.62               | 4.23                               |
| 5           | 2.06                  | 8.21               | 9.59                               |
| 6           | 2.088                 | 2.61               | 3.05                               |
| 7           | 2.187                 | 3.50               | 4.09                               |
| 8           | 2.33                  | 10.3               | 12.04                              |
| 9           | 1.81                  | 4.10               | 4.79                               |
| 10          | 1.85                  | 4.26               | 4.98                               |
| 11          | 1.67                  | 4.23               | 4.94                               |
| 12          | 1.76                  | 6.03               | 7.05                               |
| 13          | 2.01                  | 6.50               | 7.60                               |
| 14          | 1.69                  | 6.35               | 7.42                               |
| 15          | 2.10                  | 2.58               | 3.01                               |
| 16          | 1.88                  | 1.66               | 1.94                               |
| 17          | 1.70                  | 7.8                | 9.11                               |
| 18          | 1.78                  | 3.46               | 4.04                               |
| <b>Mean</b> | <b>1.91 ± 0.19</b>    | <b>4.83 ± 2.22</b> | <b>5.56 ± 2.63</b>                 |

**Table S2.** Bacterial viable cell counts (log (CFU/mL), mean ± SD) of the cecal inoculums in different culture media. Different letters mark statically significant ( $p < 0.05$ ) differences between conditions at each culture media.

| Storage time (days) | Preservation condition               | Culture media                 | Bacterial viable cell counts (log CFU/ mL) |
|---------------------|--------------------------------------|-------------------------------|--------------------------------------------|
| 0                   | Inoculum A (None)                    | CBA with 5 % (v/v) DSB        | 9.12 ± 0.06 <sup>d</sup>                   |
|                     |                                      | MCA                           | 7.47 ± 0.06 <sup>d</sup>                   |
|                     |                                      | MRSA with 0.1% (w/v) cysteine | 7.53 ± 0.08 <sup>b</sup>                   |
| 15                  | Inoculum B<br>(5% DMSO, -80 °C)      | CBA with 5 % (v/v) DSB        | 8.37 ± 0.09 <sup>c</sup>                   |
|                     |                                      | MCA                           | 7.40 ± 0.02 <sup>d</sup>                   |
|                     |                                      | MRSA with 0.1% (w/v) cysteine | 7.50 ± 0.06 <sup>b</sup>                   |
|                     | Inoculum C<br>(30% Glycerol, -20 °C) | CBA with 5 % (v/v) DSB        | 7.97 ± 0.07 <sup>a</sup>                   |
|                     |                                      | MCA                           | 7.04 ± 0.02 <sup>b</sup>                   |
|                     |                                      | MRSA with 0.1% (w/v) cysteine | 6.59 ± 0.05 <sup>a</sup>                   |
| 90                  | Inoculum B<br>(5% DMSO, -80 °C)      | CBA with 5 % (v/v) DSB        | 8.24 ± 0.02 <sup>b</sup>                   |
|                     |                                      | MCA                           | 7.15 ± 0.03 <sup>c</sup>                   |
|                     |                                      | MRSA with 0.1% (w/v) cysteine | 7.41 ± 0.05 <sup>b</sup>                   |
|                     | Inoculum C<br>(30% Glycerol, -20 °C) | CBA with 5 % (v/v) DSB        | 7.96 ± 0.03 <sup>a</sup>                   |
|                     |                                      | MCA                           | 6.79 ± 0.04 <sup>a</sup>                   |
|                     |                                      | MRSA with 0.1% (w/v) cysteine | 6.66 ± 0.04 <sup>a</sup>                   |

Legend: CBA- Columbia base agar; DSB- defibrinated sheep blood; MCA- MacConkey agar; MRSA- de man, de rogosa and sharpe agar.

**Table S3.** DMSO concentration (mM, mean  $\pm$  SD) in the frozen cecal inoculum during the two washing-out cycles.

| Sample              | DMSO concentration (mM) |
|---------------------|-------------------------|
| No washing cycle    | 595.80 $\pm$ 1.74       |
| First washing step  | 40.77 $\pm$ 6.17        |
| Second washing step | 5.58 $\pm$ 0.96         |

**Table S4.** Bacterial quantification (log (CFU/mL), means  $\pm$  SD) of the different bacterial populations in cecal fermentation for different conditions with fresh (A) and frozen (B) inoculum. Different letters mark statically significant ( $p < 0.05$ ) differences between the same conditions at each sampling time, in each inoculum.

| Inoculum   | Condition | Time (h) | Bacterial concentration (log (CFU/mL)) |                                 |                                  |                                 |                                 |                                        |
|------------|-----------|----------|----------------------------------------|---------------------------------|----------------------------------|---------------------------------|---------------------------------|----------------------------------------|
|            |           |          | Firmicutes (Firm)                      | Bacteroidetes (Bdt)             | <i>Lactobacillus</i> group (Lac) | <i>Bacteroides</i> (Bac)        | <i>Bifidobacterium</i> (Bif)    | <i>Enterobacteriaceae</i> family (Enb) |
| Fresh (A)  | IC        | 0        | 7.68 $\pm$ 0.03 <sup>b</sup>           | 6.72 $\pm$ 0.04 <sup>b</sup>    | 6.47 $\pm$ 0.04 <sup>a</sup>     | 6.51 $\pm$ 0.02 <sup>a</sup>    | 2.38 $\pm$ 0.16 <sup>a</sup>    | 6.89 $\pm$ 0.03 <sup>c</sup>           |
|            |           | 24       | 7.37 $\pm$ 0.04 <sup>b</sup>           | 6.93 $\pm$ 0.09 <sup>b</sup>    | 6.13 $\pm$ 0.04 <sup>a</sup>     | 6.55 $\pm$ 0.14 <sup>a</sup>    | 2.41 $\pm$ 0.14 <sup>a</sup>    | 7.70 $\pm$ 0.11 <sup>a</sup>           |
|            |           | 48       | 7.12 $\pm$ 0.08 <sup>a</sup>           | 6.95 $\pm$ 0.14 <sup>a, b</sup> | 5.99 $\pm$ 0.05 <sup>a</sup>     | 6.59 $\pm$ 0.17 <sup>a</sup>    | 2.27 $\pm$ 0.10 <sup>a</sup>    | 7.60 $\pm$ 0.12 <sup>a</sup>           |
|            | SCF       | 0        | 7.59 $\pm$ 0.11 <sup>a, b</sup>        | 6.98 $\pm$ 0.04 <sup>d</sup>    | 6.48 $\pm$ 0.08 <sup>a</sup>     | 6.57 $\pm$ 0.04 <sup>a, b</sup> | 2.47 $\pm$ 0.07 <sup>a</sup>    | 7.07 $\pm$ 0.05 <sup>d</sup>           |
|            |           | 24       | 6.81 $\pm$ 0.06 <sup>a</sup>           | 7.45 $\pm$ 0.11 <sup>d</sup>    | 7.06 $\pm$ 0.11 <sup>c</sup>     | 7.09 $\pm$ 0.08 <sup>c, d</sup> | 4.97 $\pm$ 0.10 <sup>c, d</sup> | 7.69 $\pm$ 0.06 <sup>a</sup>           |
|            |           | 48       | 7.63 $\pm$ 0.11 <sup>c</sup>           | 7.16 $\pm$ 0.05 <sup>b</sup>    | 6.81 $\pm$ 0.06 <sup>c</sup>     | 6.75 $\pm$ 0.06 <sup>a, b</sup> | 5.54 $\pm$ 0.02 <sup>d</sup>    | 7.65 $\pm$ 0.02 <sup>a</sup>           |
|            | SCF + FOS | 0        | 7.64 $\pm$ 0.09 <sup>b</sup>           | 6.86 $\pm$ 0.06 <sup>c</sup>    | 6.58 $\pm$ 0.04 <sup>a</sup>     | 6.50 $\pm$ 0.04 <sup>a</sup>    | 2.59 $\pm$ 0.09 <sup>a</sup>    | 6.99 $\pm$ 0.05 <sup>d</sup>           |
|            |           | 24       | 7.01 $\pm$ 0.10 <sup>a</sup>           | 7.11 $\pm$ 0.11 <sup>c</sup>    | 6.96 $\pm$ 0.10 <sup>c</sup>     | 6.77 $\pm$ 0.06 <sup>d</sup>    | 4.63 $\pm$ 0.23 <sup>c</sup>    | 7.86 $\pm$ 0.03 <sup>b, c</sup>        |
|            |           | 48       | 7.24 $\pm$ 0.04 <sup>a, b</sup>        | 7.03 $\pm$ 0.13 <sup>a, b</sup> | 6.91 $\pm$ 0.20 <sup>c</sup>     | 6.60 $\pm$ 0.14 <sup>a</sup>    | 4.92 $\pm$ 0.06 <sup>c</sup>    | 7.75 $\pm$ 0.14 <sup>a</sup>           |
| Frozen (B) | IC        | 0        | 7.59 $\pm$ 0.09 <sup>a, b</sup>        | 6.37 $\pm$ 0.05 <sup>a</sup>    | 6.60 $\pm$ 0.12 <sup>a, b</sup>  | 6.68 $\pm$ 0.06 <sup>b, c</sup> | 2.42 $\pm$ 0.10 <sup>a</sup>    | 6.61 $\pm$ 0.03 <sup>a</sup>           |
|            |           | 24       | 7.63 $\pm$ 0.03 <sup>c</sup>           | 6.62 $\pm$ 0.08 <sup>a</sup>    | 6.35 $\pm$ 0.10 <sup>b</sup>     | 6.90 $\pm$ 0.03 <sup>b, c</sup> | 2.87 $\pm$ 0.12 <sup>b</sup>    | 7.65 $\pm$ 0.03 <sup>a</sup>           |
|            |           | 48       | 7.19 $\pm$ 0.09 <sup>a, b</sup>        | 6.78 $\pm$ 0.19 <sup>a</sup>    | 6.36 $\pm$ 0.06 <sup>b</sup>     | 7.02 $\pm$ 0.06 <sup>b, c</sup> | 2.69 $\pm$ 0.08 <sup>b</sup>    | 7.69 $\pm$ 0.08 <sup>a</sup>           |
|            | SCF       | 0        | 7.55 $\pm$ 0.02 <sup>a, b</sup>        | 6.45 $\pm$ 0.05 <sup>a</sup>    | 6.86 $\pm$ 0.02 <sup>c</sup>     | 6.64 $\pm$ 0.11 <sup>b</sup>    | 2.57 $\pm$ 0.15 <sup>a</sup>    | 6.80 $\pm$ 0.02 <sup>b</sup>           |
|            |           | 24       | 6.81 $\pm$ 0.23 <sup>a</sup>           | 7.11 $\pm$ 0.11 <sup>c</sup>    | 7.29 $\pm$ 0.08 <sup>d</sup>     | 7.06 $\pm$ 0.09 <sup>c, d</sup> | 5.23 $\pm$ 0.06 <sup>d</sup>    | 7.75 $\pm$ 0.11 <sup>a, b</sup>        |
|            |           | 48       | 7.52 $\pm$ 0.07 <sup>c</sup>           | 6.87 $\pm$ 0.07 <sup>a</sup>    | 6.94 $\pm$ 0.13 <sup>c</sup>     | 7.03 $\pm$ 0.31 <sup>b, c</sup> | 5.58 $\pm$ 0.09 <sup>d</sup>    | 7.69 $\pm$ 0.10 <sup>a</sup>           |
|            | SCF + FOS | 0        | 7.48 $\pm$ 0.10 <sup>a</sup>           | 6.45 $\pm$ 0.07 <sup>a</sup>    | 6.67 $\pm$ 0.11 <sup>b</sup>     | 6.77 $\pm$ 0.05 <sup>c</sup>    | 2.51 $\pm$ 0.11 <sup>a</sup>    | 6.77 $\pm$ 0.05 <sup>b</sup>           |
|            |           | 24       | 6.93 $\pm$ 0.14 <sup>a</sup>           | 7.23 $\pm$ 0.06 <sup>c</sup>    | 7.29 $\pm$ 0.07 <sup>d</sup>     | 7.41 $\pm$ 0.06 <sup>e</sup>    | 5.54 $\pm$ 0.31 <sup>e</sup>    | 7.93 $\pm$ 0.04 <sup>c</sup>           |
|            |           | 48       | 7.31 $\pm$ 0.02 <sup>b</sup>           | 6.95 $\pm$ 0.12 <sup>a, b</sup> | 6.73 $\pm$ 0.19 <sup>c</sup>     | 7.18 $\pm$ 0.12 <sup>c</sup>    | 5.82 $\pm$ 0.08 <sup>e</sup>    | 7.76 $\pm$ 0.12 <sup>a</sup>           |

Legend: FOS- fructo-oligosaccharides; IC- inoculum control; SCF- standard chicken feed.

**Table S5.** Concentration (mM, means  $\pm$  SD) of the different organic acids produced during cecal fermentation with fresh (A) and frozen (B) inoculum. Different letters mark statistically significant ( $p < 0.05$ ) differences between each condition at each sampling time.

| Inoculum   | Condition | Time (h) | Concentration (mM)            |                                  |                                  |                                 |                  | Ratio A: P: B |
|------------|-----------|----------|-------------------------------|----------------------------------|----------------------------------|---------------------------------|------------------|---------------|
|            |           |          | L                             | A                                | P                                | B                               | Sum SCFA (A+P+B) |               |
| Fresh (A)  | IC        | 0        | Nd                            | Nd                               | Nd                               | Nd                              | Nd               | Nd            |
|            |           | 24       | Nd <sup>a</sup>               | 32.20 $\pm$ 0.53 <sup>c</sup>    | 5.05 $\pm$ 0.05 <sup>a</sup>     | 4.76 $\pm$ 0.19 <sup>d</sup>    | 42               | 7:1:1         |
|            |           | 48       | Nd                            | 33.37 $\pm$ 0.47 <sup>b</sup>    | 5.07 $\pm$ 0.21 <sup>a</sup>     | 4.79 $\pm$ 0.32 <sup>c</sup>    | 43               | 7:1:1         |
|            | SCF       | 0        | Nd                            | Nd                               | Nd                               | Nd                              | Nd               | Nd            |
|            |           | 24       | 55.24 $\pm$ 1.11 <sup>c</sup> | 22.76 $\pm$ 1.26 <sup>a, b</sup> | 11.31 $\pm$ 0.46 <sup>c</sup>    | 3.46 $\pm$ 0.34 <sup>b, c</sup> | 38               | 7:3:1         |
|            |           | 48       | Nd                            | 37.59 $\pm$ 0.82 <sup>c</sup>    | 28.65 $\pm$ 1.81 <sup>b, c</sup> | 5.13 $\pm$ 0.34 <sup>c</sup>    | 71               | 7:6:1         |
|            | SCF + FOS | 0        | Nd                            | Nd                               | Nd                               | Nd                              | Nd               | Nd            |
|            |           | 24       | 46.16 $\pm$ 2.28 <sup>b</sup> | 29.40 $\pm$ 5.96 <sup>b, c</sup> | 13.25 $\pm$ 0.34 <sup>d</sup>    | 3.27 $\pm$ 0.10                 | 46               | 9:4:1         |
|            |           | 48       | Nd                            | 38.53 $\pm$ 0.90 <sup>c</sup>    | 32.34 $\pm$ 1.39 <sup>c</sup>    | 4.49 $\pm$ 0.26                 | 75               | 9:7:1         |
| Frozen (B) | IC        | 0        | Nd                            | Nd                               | Nd                               | Nd                              | Nd               | Nd            |
|            |           | 24       | Nd                            | 17.89 $\pm$ 0.80 <sup>a</sup>    | 5.79 $\pm$ 0.34 <sup>a</sup>     | 3.84 $\pm$ 0.13 <sup>c</sup>    | 28               | 5:2:1         |
|            |           | 48       | Nd                            | 21.56 $\pm$ 0.06 <sup>a</sup>    | 6.95 $\pm$ 0.34 <sup>a</sup>     | 3.44 $\pm$ 0.15 <sup>b</sup>    | 32               | 6:2:1         |

|           |    |                           |                           |                              |                          |    |         |
|-----------|----|---------------------------|---------------------------|------------------------------|--------------------------|----|---------|
|           | 0  | Nd                        | Nd                        | Nd                           | Nd                       | Nd | Nd      |
| SCF       | 24 | 49.98 ± 1.23 <sup>b</sup> | 20.19 ± 0.23 <sup>a</sup> | 8.95 ± 0.55 <sup>b</sup>     | Nd <sup>a</sup>          | 29 | Nd      |
|           | 48 | Nd                        | 42.71 ± 0.82 <sup>d</sup> | 26.69 ± 2.27 <sup>b</sup>    | 2.07 ± 0.68 <sup>a</sup> | 71 | 21:13:1 |
|           | 0  | Nd                        | Nd                        | Nd                           | Nd                       | Nd | Nd      |
| SCF + FOS | 24 | 57.42 ± 3.34 <sup>c</sup> | 21.71 ± 1.59 <sup>a</sup> | 8.64 ± 0.33 <sup>b</sup>     | Nd <sup>a</sup>          | 30 | Nd      |
|           | 48 | Nd                        | 46.70 ± 0.95 <sup>e</sup> | 29.45 ± 2.11 <sup>b, c</sup> | 1.92 ± 0.09 <sup>a</sup> | 78 | 24:15:1 |

Legend: A- Acetate; B- Butyrate; FOS- fructo-oligosaccharides; IC- inoculum control; Nd- not detected; P- Propionate; SCFA- Short-chain fatty acids; SCF- standard chicken feed.

**Table S6.** Concentration (mM, means ± SD) of total ammonia nitrogen produced during cecal fermentation with fresh (A) and frozen (B) inoculum. Different letters mark statistically significant ( $p < 0.05$ ) differences between each condition at the same sampling time.

| Inoculum   | Condition | Sampling time point (h) | Total ammonia nitrogen (mM) |
|------------|-----------|-------------------------|-----------------------------|
| Fresh (A)  | IC        | 0                       | 3.70 ± 0.03 <sup>b</sup>    |
|            |           | 24                      | 33.42 ± 0.47 <sup>c</sup>   |
|            |           | 48                      | 41.48 ± 0.29 <sup>e</sup>   |
|            | SCF       | 0                       | 3.79 ± 0.01 <sup>b</sup>    |
|            |           | 24                      | 18.17 ± 1.75 <sup>b</sup>   |
|            |           | 48                      | 35.93 ± 0.91 <sup>d</sup>   |
|            | SCF + FOS | 0                       | 3.86 ± 0.02 <sup>b</sup>    |
|            |           | 24                      | 19.55 ± 0.61 <sup>b</sup>   |
|            |           | 48                      | 32.07 ± 0.29 <sup>c</sup>   |
| Frozen (B) | IC        | 0                       | 1.42 ± 0.03 <sup>a</sup>    |
|            |           | 24                      | 19.26 ± 0.59 <sup>b</sup>   |
|            |           | 48                      | 22.85 ± 0.07 <sup>b</sup>   |
|            | SCF       | 0                       | 1.74 ± 0.17 <sup>a</sup>    |
|            |           | 24                      | 10.17 ± 0.92 <sup>a</sup>   |
|            |           | 48                      | 20.04 ± 0.98 <sup>a</sup>   |
|            | SCF + FOS | 0                       | 1.63 ± 0.32 <sup>a</sup>    |
|            |           | 24                      | 10.25 ± 0.19 <sup>a</sup>   |
|            |           | 48                      | 19.41 ± 0.08 <sup>a</sup>   |

Legend: FOS- fructo-oligosaccharides; IC- inoculum control; SCF- standard chicken feed.
